# Supplementary material
Source: publisher figshare collection journal article supplement (https://frontiersin.figshare.com/ndownloader/files/21787236)
Supplement: Supplementary file 1 [file 21787236]

Table 3: Species richness of epifaunal taxa for coral habitats at 50 m2 spatial scale.
Transect	Transect_segment_ID	Species_Richness	Intact_Coral	Coral_Rubble	#_Coral_heads
TAN1402/12	12_0	0	87	0	0
TAN1402/12	12_1	6	27	0	2
TAN1402/12	12_10	5	45	27	0
TAN1402/12	12_11	3	0	0	0
TAN1402/12	12_12	5	0	0	0
TAN1402/12	12_13	4	0	0	0
TAN1402/12	12_14	6	0	0	0
TAN1402/12	12_15	7	0	0	0
TAN1402/12	12_16	4	6	13	0
TAN1402/12	12_17	2	0	0	0
TAN1402/12	12_18	0	0	0	0
TAN1402/12	12_19	4	68	0	0
TAN1402/12	12_2	5	3	0	0
TAN1402/12	12_20	3	0	0	0
TAN1402/12	12_21	4	0	0	0
TAN1402/12	12_22	1	0	0	0
TAN1402/12	12_23	2	0	7	0
TAN1402/12	12_24	1	0	0	0
TAN1402/12	12_25	4	0	0	0
TAN1402/12	12_26	5	10	0	0
TAN1402/12	12_27	3	0	0	0
TAN1402/12	12_28	7	12	0	1
TAN1402/12	12_29	4	4	0	0
TAN1402/12	12_3	3	5	0	0
TAN1402/12	12_30	3	16	7	0
TAN1402/12	12_31	4	0	7	0
TAN1402/12	12_32	0	0	0	0
TAN1402/12	12_33	4	0	0	0
TAN1402/12	12_34	3	0	0	0
TAN1402/12	12_35	0	6	0	0
TAN1402/12	12_36	1	0	0	0
TAN1402/12	12_37	4	0	0	0
TAN1402/12	12_38	1	0	0	0
TAN1402/12	12_39	1	93	0	0
TAN1402/12	12_4	7	3	0	1
TAN1402/12	12_40	4	54	0	0
TAN1402/12	12_41	3	24	0	0
TAN1402/12	12_42	1	27	0	0
TAN1402/12	12_43	6	0	0	0
TAN1402/12	12_44	2	0	0	0
TAN1402/12	12_45	2	0	0	0
TAN1402/12	12_46	1	0	0	0
TAN1402/12	12_47	5	0	0	0
TAN1402/12	12_48	2	0	0	0
TAN1402/12	12_49	2	0	0	0
TAN1402/12	12_5	1	0	0	0
TAN1402/12	12_50	0	0	4	0
TAN1402/12	12_51	1	0	0	0
TAN1402/12	12_52	1	0	0	0
TAN1402/12	12_53	5	0	0	0
TAN1402/12	12_54	4	0	0	0
TAN1402/12	12_55	1	0	0	0
TAN1402/12	12_56	3	0	0	0
TAN1402/12	12_57	0	0	0	0
TAN1402/12	12_58	1	0	0	0
TAN1402/12	12_59	0	0	0	0
TAN1402/12	12_6	3	0	0	0
TAN1402/12	12_60	6	0	0	0
TAN1402/12	12_61	3	6	0	0
TAN1402/12	12_62	2	21	0	0
TAN1402/12	12_63	1	0	11	0
TAN1402/12	12_64	5	0	0	0
TAN1402/12	12_65	3	0	0	0
TAN1402/12	12_66	5	0	0	0
TAN1402/12	12_67	2	0	0	0
TAN1402/12	12_68	4	0	0	0
TAN1402/12	12_69	1	14	0	0
TAN1402/12	12_7	3	60	0	0
TAN1402/12	12_70	6	0	0	0
TAN1402/12	12_71	1	0	0	0
TAN1402/12	12_72	0	5	8	0
TAN1402/12	12_73	3	5	0	0
TAN1402/12	12_74	2	22	0	0
TAN1402/12	12_75	1	0	0	0
TAN1402/12	12_76	1	0	0	0
TAN1402/12	12_77	2	0	0	0
TAN1402/12	12_78	3	0	0	0
TAN1402/12	12_79	0	0	0	0
TAN1402/12	12_8	5	4	37	0
TAN1402/12	12_80	4	0	0	0
TAN1402/12	12_81	4	0	0	0
TAN1402/12	12_82	2	0	0	0
TAN1402/12	12_83	3	0	0	0
TAN1402/12	12_84	2	0	0	0
TAN1402/12	12_85	2	0	0	0
TAN1402/12	12_9	4	0	0	0
TAN1402/13	13_0	0	0	0	0
TAN1402/13	13_1	4	0	0	0
TAN1402/13	13_10	4	63	15	1
TAN1402/13	13_11	2	0	75	0
TAN1402/13	13_12	5	43	0	0
TAN1402/13	13_13	1	0	0	0
TAN1402/13	13_14	0	0	0	0
TAN1402/13	13_15	0	0	0	0
TAN1402/13	13_16	0	0	0	0
TAN1402/13	13_2	3	10	0	0
TAN1402/13	13_3	5	0	0	1
TAN1402/13	13_4	4	22	0	0
TAN1402/13	13_5	6	0	0	0
TAN1402/13	13_6	4	0	8	0
TAN1402/13	13_7	4	0	6	0
TAN1402/13	13_8	4	0	17	0
TAN1402/13	13_9	5	75	15	3
TAN1402/18	18_0	1	9	24	0
TAN1402/18	18_1	3	0	0	1
TAN1402/18	18_10	1	22	14	0
TAN1402/18	18_11	1	0	31	0
TAN1402/18	18_12	2	0	38	0
TAN1402/18	18_13	3	0	57	1
TAN1402/18	18_14	5	19	7	2
TAN1402/18	18_15	10	7	0	10
TAN1402/18	18_16	1	0	0	0
TAN1402/18	18_17	0	0	0	0
TAN1402/18	18_18	0	0	0	0
TAN1402/18	18_19	8	0	24	0
TAN1402/18	18_2	1	0	0	0
TAN1402/18	18_20	2	0	4	0
TAN1402/18	18_21	3	0	23	0
TAN1402/18	18_22	3	0	10	0
TAN1402/18	18_23	1	35	6	0
TAN1402/18	18_24	4	3	0	0
TAN1402/18	18_25	3	4	0	0
TAN1402/18	18_26	1	63	0	0
TAN1402/18	18_27	4	71	12	4
TAN1402/18	18_28	6	56	0	2
TAN1402/18	18_29	2	19	0	0
TAN1402/18	18_3	2	0	0	0
TAN1402/18	18_30	9	51	0	4
TAN1402/18	18_31	2	25	0	0
TAN1402/18	18_32	2	12	0	0
TAN1402/18	18_33	1	0	0	0
TAN1402/18	18_34	3	2	4	0
TAN1402/18	18_35	4	0	0	0
TAN1402/18	18_36	3	3	0	0
TAN1402/18	18_37	3	24	4	0
TAN1402/18	18_38	4	3	0	0
TAN1402/18	18_39	5	0	0	0
TAN1402/18	18_4	4	0	0	0
TAN1402/18	18_40	1	0	0	0
TAN1402/18	18_41	5	0	0	0
TAN1402/18	18_42	2	0	0	0
TAN1402/18	18_43	1	0	0	0
TAN1402/18	18_44	1	0	0	0
TAN1402/18	18_45	2	0	0	0
TAN1402/18	18_46	3	0	0	0
TAN1402/18	18_47	6	0	0	0
TAN1402/18	18_48	0	0	0	0
TAN1402/18	18_49	0	0	0	0
TAN1402/18	18_5	6	2	33	3
TAN1402/18	18_50	0	0	0	0
TAN1402/18	18_51	0	0	0	0
TAN1402/18	18_52	2	0	0	0
TAN1402/18	18_53	1	0	0	0
TAN1402/18	18_54	2	0	0	0
TAN1402/18	18_55	1	0	0	0
TAN1402/18	18_56	1	0	0	0
TAN1402/18	18_57	0	0	0	0
TAN1402/18	18_58	0	0	0	0
TAN1402/18	18_6	8	2	16	31
TAN1402/18	18_7	8	0	0	33
TAN1402/18	18_8	2	15	0	1
TAN1402/18	18_9	1	0	0	0
TAN1402/19	19_0	2	50	0	0
TAN1402/19	19_1	1	15	0	0
TAN1402/19	19_10	1	0	0	0
TAN1402/19	19_11	1	0	0	0
TAN1402/19	19_12	1	0	0	0
TAN1402/19	19_13	3	0	0	1
TAN1402/19	19_14	1	0	14	0
TAN1402/19	19_15	1	0	0	0
TAN1402/19	19_16	1	23	0	0
TAN1402/19	19_17	2	0	0	0
TAN1402/19	19_18	0	0	0	0
TAN1402/19	19_19	0	0	0	0
TAN1402/19	19_2	1	0	14	0
TAN1402/19	19_20	1	0	0	0
TAN1402/19	19_21	1	0	0	0
TAN1402/19	19_22	0	0	0	0
TAN1402/19	19_23	2	0	7	0
TAN1402/19	19_24	1	0	0	0
TAN1402/19	19_25	3	0	16	0
TAN1402/19	19_26	1	0	7	0
TAN1402/19	19_27	3	0	7	0
TAN1402/19	19_28	1	0	0	0
TAN1402/19	19_29	1	0	0	0
TAN1402/19	19_3	2	0	0	0
TAN1402/19	19_30	1	0	0	0
TAN1402/19	19_31	3	0	0	0
TAN1402/19	19_32	1	0	0	0
TAN1402/19	19_33	0	0	0	0
TAN1402/19	19_34	1	0	0	0
TAN1402/19	19_35	2	0	0	0
TAN1402/19	19_36	1	0	0	0
TAN1402/19	19_37	1	0	6	0
TAN1402/19	19_38	2	0	0	0
TAN1402/19	19_39	1	0	0	0
TAN1402/19	19_4	5	8	0	0
TAN1402/19	19_40	0	0	0	0
TAN1402/19	19_41	0	0	0	0
TAN1402/19	19_42	1	0	0	0
TAN1402/19	19_43	0	0	0	0
TAN1402/19	19_44	4	0	0	0
TAN1402/19	19_45	1	0	0	0
TAN1402/19	19_46	1	0	0	0
TAN1402/19	19_47	1	0	0	0
TAN1402/19	19_48	1	0	0	0
TAN1402/19	19_49	0	0	0	0
TAN1402/19	19_5	2	0	0	0
TAN1402/19	19_50	0	0	0	0
TAN1402/19	19_51	0	0	0	0
TAN1402/19	19_52	1	0	0	0
TAN1402/19	19_53	0	0	0	0
TAN1402/19	19_54	0	0	0	0
TAN1402/19	19_55	2	0	0	0
TAN1402/19	19_56	5	59	6	4
TAN1402/19	19_57	5	3	23	2
TAN1402/19	19_58	0	0	0	0
TAN1402/19	19_59	0	0	0	0
TAN1402/19	19_6	1	0	0	0
TAN1402/19	19_60	2	0	0	1
TAN1402/19	19_61	1	0	0	0
TAN1402/19	19_62	2	0	0	1
TAN1402/19	19_63	3	0	4	2
TAN1402/19	19_64	3	0	19	0
TAN1402/19	19_65	3	0	5	2
TAN1402/19	19_66	5	0	24	1
TAN1402/19	19_67	4	18	36	2
TAN1402/19	19_68	5	15	44	2
TAN1402/19	19_69	0	0	29	0
TAN1402/19	19_7	1	0	0	0
TAN1402/19	19_70	1	0	61	0
TAN1402/19	19_71	2	0	23	0
TAN1402/19	19_72	0	0	0	0
TAN1402/19	19_73	0	0	24	0
TAN1402/19	19_74	0	0	28	0
TAN1402/19	19_75	5	0	0	4
TAN1402/19	19_76	4	0	32	3
TAN1402/19	19_77	4	0	100	2
TAN1402/19	19_78	0	0	94	0
TAN1402/19	19_79	6	43	16	5
TAN1402/19	19_8	1	0	0	0
TAN1402/19	19_80	4	78	11	12
TAN1402/19	19_81	3	0	44	1
TAN1402/19	19_82	1	0	69	0
TAN1402/19	19_83	5	10	7	3
TAN1402/19	19_84	1	13	50	0
TAN1402/19	19_85	0	0	17	0
TAN1402/19	19_86	0	0	0	0
TAN1402/19	19_9	2	0	0	0
TAN1402/20	20_0	0	0	0	0
TAN1402/20	20_1	4	0	0	0
TAN1402/20	20_10	2	0	0	0
TAN1402/20	20_11	2	0	0	0
TAN1402/20	20_12	2	0	0	0
TAN1402/20	20_13	2	0	0	0
TAN1402/20	20_14	1	0	0	0
TAN1402/20	20_15	3	0	0	0
TAN1402/20	20_16	2	0	0	0
TAN1402/20	20_17	2	0	0	0
TAN1402/20	20_18	1	0	0	0
TAN1402/20	20_19	1	0	0	0
TAN1402/20	20_2	1	0	0	0
TAN1402/20	20_20	1	0	0	0
TAN1402/20	20_21	1	0	0	0
TAN1402/20	20_22	1	0	0	0
TAN1402/20	20_23	0	0	0	0
TAN1402/20	20_24	1	0	0	0
TAN1402/20	20_25	0	0	0	0
TAN1402/20	20_26	1	0	0	0
TAN1402/20	20_27	0	0	0	0
TAN1402/20	20_28	1	0	0	0
TAN1402/20	20_29	0	0	0	0
TAN1402/20	20_3	1	0	0	0
TAN1402/20	20_30	0	0	0	0
TAN1402/20	20_31	0	0	0	0
TAN1402/20	20_32	0	0	0	0
TAN1402/20	20_33	0	0	0	0
TAN1402/20	20_34	1	0	0	0
TAN1402/20	20_35	0	0	0	0
TAN1402/20	20_36	0	0	0	0
TAN1402/20	20_37	1	0	0	0
TAN1402/20	20_38	3	0	0	0
TAN1402/20	20_39	2	0	0	0
TAN1402/20	20_4	1	0	0	0
TAN1402/20	20_40	0	0	0	0
TAN1402/20	20_41	0	0	0	0
TAN1402/20	20_42	0	0	0	0
TAN1402/20	20_43	0	0	0	0
TAN1402/20	20_44	0	0	0	0
TAN1402/20	20_45	0	0	0	0
TAN1402/20	20_46	4	18	0	1
TAN1402/20	20_47	1	0	0	0
TAN1402/20	20_48	1	0	0	0
TAN1402/20	20_49	2	0	0	0
TAN1402/20	20_5	3	0	0	0
TAN1402/20	20_50	1	0	18	0
TAN1402/20	20_51	1	0	0	0
TAN1402/20	20_52	1	0	0	0
TAN1402/20	20_53	0	0	21	0
TAN1402/20	20_54	1	0	6	0
TAN1402/20	20_55	1	86	0	0
TAN1402/20	20_56	3	85	0	1
TAN1402/20	20_57	5	55	0	2
TAN1402/20	20_58	5	5	12	1
TAN1402/20	20_59	7	0	59	3
TAN1402/20	20_6	1	0	0	0
TAN1402/20	20_60	2	0	13	0
TAN1402/20	20_61	0	0	3	0
TAN1402/20	20_62	4	27	0	2
TAN1402/20	20_63	1	0	9	0
TAN1402/20	20_64	3	25	0	2
TAN1402/20	20_65	2	15	0	1
TAN1402/20	20_66	0	0	10	0
TAN1402/20	20_67	0	0	0	0
TAN1402/20	20_68	1	0	17	0
TAN1402/20	20_69	0	0	0	0
TAN1402/20	20_7	1	0	0	0
TAN1402/20	20_70	0	0	0	0
TAN1402/20	20_71	0	0	0	0
TAN1402/20	20_8	1	0	0	0
TAN1402/20	20_9	2	0	0	0
TAN1402/25	25_0	1	0	0	0
TAN1402/25	25_1	1	26	0	0
TAN1402/25	25_10	5	23	11	0
TAN1402/25	25_11	1	29	0	0
TAN1402/25	25_12	3	12	0	0
TAN1402/25	25_13	1	0	0	0
TAN1402/25	25_14	2	0	0	0
TAN1402/25	25_15	1	0	0	0
TAN1402/25	25_16	2	0	0	0
TAN1402/25	25_17	2	0	0	0
TAN1402/25	25_18	2	0	0	0
TAN1402/25	25_19	1	0	0	0
TAN1402/25	25_2	4	46	15	0
TAN1402/25	25_20	1	0	0	0
TAN1402/25	25_21	1	0	0	0
TAN1402/25	25_22	2	0	0	0
TAN1402/25	25_23	1	0	0	0
TAN1402/25	25_24	1	0	0	0
TAN1402/25	25_25	1	0	0	0
TAN1402/25	25_26	0	0	0	0
TAN1402/25	25_27	2	0	0	0
TAN1402/25	25_28	3	0	0	0
TAN1402/25	25_29	3	0	0	0
TAN1402/25	25_3	7	100	0	0
TAN1402/25	25_30	0	0	0	0
TAN1402/25	25_31	2	0	0	0
TAN1402/25	25_32	1	0	0	0
TAN1402/25	25_33	1	0	0	0
TAN1402/25	25_34	5	0	0	0
TAN1402/25	25_35	4	0	0	0
TAN1402/25	25_36	4	0	0	0
TAN1402/25	25_37	2	0	0	0
TAN1402/25	25_38	2	0	0	0
TAN1402/25	25_39	3	0	0	0
TAN1402/25	25_4	3	76	0	2
TAN1402/25	25_40	4	0	0	0
TAN1402/25	25_41	2	0	0	0
TAN1402/25	25_42	2	0	0	0
TAN1402/25	25_43	5	0	0	0
TAN1402/25	25_44	1	0	0	0
TAN1402/25	25_45	1	0	0	0
TAN1402/25	25_46	1	0	0	0
TAN1402/25	25_47	1	0	0	0
TAN1402/25	25_48	1	0	0	0
TAN1402/25	25_49	1	0	0	0
TAN1402/25	25_5	2	29	20	0
TAN1402/25	25_50	1	0	0	0
TAN1402/25	25_51	1	0	0	0
TAN1402/25	25_52	2	0	0	0
TAN1402/25	25_53	2	0	0	0
TAN1402/25	25_54	1	0	0	0
TAN1402/25	25_55	3	0	0	0
TAN1402/25	25_56	2	0	15	0
TAN1402/25	25_57	3	0	0	0
TAN1402/25	25_58	1	0	0	0
TAN1402/25	25_59	2	0	83	0
TAN1402/25	25_6	5	11	0	1
TAN1402/25	25_60	0	4	82	0
TAN1402/25	25_61	3	49	11	0
TAN1402/25	25_62	2	0	0	0
TAN1402/25	25_7	6	7	10	1
TAN1402/25	25_8	4	35	0	1
TAN1402/25	25_9	2	22	19	0
TAN1402/27	27_0	0	0	0	0
TAN1402/27	27_1	0	0	0	0
TAN1402/27	27_10	0	0	0	0
TAN1402/27	27_11	0	0	0	0
TAN1402/27	27_12	0	0	0	0
TAN1402/27	27_13	0	0	0	0
TAN1402/27	27_14	1	3	7	0
TAN1402/27	27_15	1	0	0	0
TAN1402/27	27_16	0	0	0	0
TAN1402/27	27_17	1	0	0	2
TAN1402/27	27_18	0	0	0	0
TAN1402/27	27_19	0	0	0	0
TAN1402/27	27_2	0	0	0	0
TAN1402/27	27_20	0	0	0	0
TAN1402/27	27_21	2	0	12	0
TAN1402/27	27_22	0	0	6	0
TAN1402/27	27_23	0	0	0	0
TAN1402/27	27_24	6	0	23	0
TAN1402/27	27_25	1	0	0	0
TAN1402/27	27_26	0	0	16	0
TAN1402/27	27_27	0	0	0	0
TAN1402/27	27_28	0	0	0	0
TAN1402/27	27_29	3	0	0	1
TAN1402/27	27_3	0	0	0	0
TAN1402/27	27_30	4	23	19	3
TAN1402/27	27_31	3	0	18	0
TAN1402/27	27_32	0	0	0	0
TAN1402/27	27_33	0	0	0	0
TAN1402/27	27_34	0	0	0	0
TAN1402/27	27_35	1	0	0	0
TAN1402/27	27_36	0	0	0	0
TAN1402/27	27_37	0	0	0	0
TAN1402/27	27_38	0	0	0	0
TAN1402/27	27_39	0	0	0	0
TAN1402/27	27_4	0	0	0	0
TAN1402/27	27_40	0	0	6	0
TAN1402/27	27_41	6	0	0	1
TAN1402/27	27_42	2	8	5	0
TAN1402/27	27_43	4	16	0	0
TAN1402/27	27_44	0	0	0	0
TAN1402/27	27_45	2	0	13	0
TAN1402/27	27_46	1	0	0	0
TAN1402/27	27_47	4	0	0	1
TAN1402/27	27_48	0	0	0	0
TAN1402/27	27_49	0	0	0	0
TAN1402/27	27_5	0	0	0	0
TAN1402/27	27_50	0	0	0	0
TAN1402/27	27_51	0	0	0	0
TAN1402/27	27_52	0	0	0	0
TAN1402/27	27_53	0	0	0	0
TAN1402/27	27_54	0	0	0	0
TAN1402/27	27_55	0	0	0	0
TAN1402/27	27_56	0	0	0	0
TAN1402/27	27_57	0	0	0	0
TAN1402/27	27_58	0	0	0	0
TAN1402/27	27_59	1	0	0	0
TAN1402/27	27_6	0	0	0	0
TAN1402/27	27_60	5	0	0	3
TAN1402/27	27_61	0	0	0	0
TAN1402/27	27_62	0	0	0	0
TAN1402/27	27_63	1	0	0	0
TAN1402/27	27_64	0	0	0	0
TAN1402/27	27_65	2	12	5	1
TAN1402/27	27_66	0	0	0	0
TAN1402/27	27_67	0	0	0	0
TAN1402/27	27_68	1	0	0	0
TAN1402/27	27_69	0	0	0	0
TAN1402/27	27_7	0	0	0	0
TAN1402/27	27_70	0	0	22	0
TAN1402/27	27_71	0	0	0	0
TAN1402/27	27_72	0	0	0	0
TAN1402/27	27_73	1	0	0	0
TAN1402/27	27_74	3	0	0	1
TAN1402/27	27_75	0	0	5	0
TAN1402/27	27_76	1	4	4	0
TAN1402/27	27_77	0	0	0	0
TAN1402/27	27_78	0	0	0	0
TAN1402/27	27_79	1	0	0	0
TAN1402/27	27_8	0	0	0	0
TAN1402/27	27_80	2	0	0	1
TAN1402/27	27_81	0	0	0	0
TAN1402/27	27_9	0	0	0	0
TAN1402/6	6_0	0	0	0	0
TAN1402/6	6_1	1	11	14	0
TAN1402/6	6_10	2	0	4	0
TAN1402/6	6_11	1	11	5	0
TAN1402/6	6_12	2	0	0	0
TAN1402/6	6_13	4	15	0	0
TAN1402/6	6_14	1	0	8	0
TAN1402/6	6_15	1	0	0	0
TAN1402/6	6_16	5	0	0	0
TAN1402/6	6_17	2	0	0	0
TAN1402/6	6_18	1	0	0	0
TAN1402/6	6_19	0	0	0	0
TAN1402/6	6_2	4	13	61	2
TAN1402/6	6_20	1	0	0	0
TAN1402/6	6_21	3	11	0	0
TAN1402/6	6_22	6	20	0	0
TAN1402/6	6_23	4	0	3	0
TAN1402/6	6_24	0	0	0	0
TAN1402/6	6_25	1	0	0	0
TAN1402/6	6_26	3	0	23	0
TAN1402/6	6_27	5	26	0	0
TAN1402/6	6_28	2	0	0	0
TAN1402/6	6_29	3	16	0	1
TAN1402/6	6_3	1	8	25	0
TAN1402/6	6_30	3	21	0	0
TAN1402/6	6_31	2	0	0	0
TAN1402/6	6_32	1	0	0	0
TAN1402/6	6_33	0	0	3	0
TAN1402/6	6_34	0	0	46	0
TAN1402/6	6_35	1	0	0	0
TAN1402/6	6_36	0	0	0	0
TAN1402/6	6_37	0	0	0	0
TAN1402/6	6_38	0	0	0	0
TAN1402/6	6_39	0	0	0	0
TAN1402/6	6_4	2	14	29	1
TAN1402/6	6_40	0	0	0	0
TAN1402/6	6_41	0	23	0	0
TAN1402/6	6_42	2	7	11	0
TAN1402/6	6_43	2	0	30	0
TAN1402/6	6_44	8	12	0	2
TAN1402/6	6_45	2	0	0	0
TAN1402/6	6_46	2	0	0	0
TAN1402/6	6_47	2	0	0	0
TAN1402/6	6_48	1	0	0	0
TAN1402/6	6_49	4	0	0	0
TAN1402/6	6_5	2	12	0	0
TAN1402/6	6_50	3	0	0	0
TAN1402/6	6_51	5	0	0	0
TAN1402/6	6_52	3	0	0	0
TAN1402/6	6_53	2	0	0	0
TAN1402/6	6_54	3	7	0	0
TAN1402/6	6_55	4	6	0	0
TAN1402/6	6_56	3	0	0	0
TAN1402/6	6_57	4	6	14	0
TAN1402/6	6_58	4	0	0	0
TAN1402/6	6_59	2	0	0	0
TAN1402/6	6_6	2	0	4	0
TAN1402/6	6_60	0	0	0	0
TAN1402/6	6_7	3	19	0	0
TAN1402/6	6_8	1	0	0	0
TAN1402/6	6_9	3	29	0	0
TAN1402/9	9_0	1	0	0	0
TAN1402/9	9_1	3	16	17	0
TAN1402/9	9_10	0	16	0	0
TAN1402/9	9_11	0	28	0	0
TAN1402/9	9_12	0	13	6	0
TAN1402/9	9_13	0	0	6	0
TAN1402/9	9_14	2	18	0	2
TAN1402/9	9_15	1	9	36	0
TAN1402/9	9_16	3	0	27	0
TAN1402/9	9_17	5	0	0	1
TAN1402/9	9_18	0	0	0	0
TAN1402/9	9_19	1	0	0	0
TAN1402/9	9_2	2	47	33	0
TAN1402/9	9_20	2	0	0	0
TAN1402/9	9_21	1	0	0	0
TAN1402/9	9_22	3	0	0	0
TAN1402/9	9_23	1	0	0	0
TAN1402/9	9_24	1	0	0	0
TAN1402/9	9_25	0	0	0	0
TAN1402/9	9_26	0	0	0	0
TAN1402/9	9_27	0	0	0	0
TAN1402/9	9_28	0	0	0	0
TAN1402/9	9_29	0	0	0	0
TAN1402/9	9_3	0	95	0	0
TAN1402/9	9_30	0	0	0	0
TAN1402/9	9_31	0	0	0	0
TAN1402/9	9_32	0	0	0	0
TAN1402/9	9_33	0	4	0	0
TAN1402/9	9_34	1	0	0	0
TAN1402/9	9_35	2	0	0	0
TAN1402/9	9_36	1	0	0	0
TAN1402/9	9_37	0	0	0	0
TAN1402/9	9_38	1	0	0	0
TAN1402/9	9_39	0	0	5	0
TAN1402/9	9_4	0	80	0	0
TAN1402/9	9_40	1	0	21	0
TAN1402/9	9_41	1	0	44	0
TAN1402/9	9_42	2	16	18	1
TAN1402/9	9_43	1	2	0	0
TAN1402/9	9_44	0	0	0	0
TAN1402/9	9_45	0	0	0	0
TAN1402/9	9_46	0	0	0	0
TAN1402/9	9_47	1	0	35	0
TAN1402/9	9_48	1	0	0	0
TAN1402/9	9_49	0	5	0	0
TAN1402/9	9_5	1	0	0	0
TAN1402/9	9_50	5	24	16	3
TAN1402/9	9_51	0	0	0	0
TAN1402/9	9_52	0	0	0	0
TAN1402/9	9_53	1	0	0	0
TAN1402/9	9_54	2	0	7	0
TAN1402/9	9_55	3	0	21	1
TAN1402/9	9_56	1	0	17	0
TAN1402/9	9_57	1	0	0	0
TAN1402/9	9_58	0	0	0	0
TAN1402/9	9_59	0	0	0	0
TAN1402/9	9_6	1	0	0	0
TAN1402/9	9_60	0	0	42	0
TAN1402/9	9_61	0	0	0	0
TAN1402/9	9_62	0	0	0	0
TAN1402/9	9_63	0	0	0	0
TAN1402/9	9_64	1	22	43	0
TAN1402/9	9_65	3	40	60	3
TAN1402/9	9_66	4	35	47	2
TAN1402/9	9_67	1	0	40	0
TAN1402/9	9_68	0	0	42	0
TAN1402/9	9_69	3	0	81	0
TAN1402/9	9_7	1	0	0	0
TAN1402/9	9_70	1	0	87	0
TAN1402/9	9_71	8	42	47	1
TAN1402/9	9_72	3	15	62	0
TAN1402/9	9_73	7	17	62	8
TAN1402/9	9_74	5	76	6	3
TAN1402/9	9_75	1	0	0	0
TAN1402/9	9_76	1	0	12	0
TAN1402/9	9_77	0	0	0	0
TAN1402/9	9_8	1	0	0	0
TAN1402/9	9_9	1	6	0	0
